# Supplementary material for: Retracted article: Electrochemical hydrogen production in aqueous micellar solution by a diiron benzenedithiolate complex relevant to [FeFe] hydrogenases
Source: Royal Society of Chemistry journal article supplement (doi:10.1039/c2cp40085e), 2012-01-01
Supplement: c2cp40085e-esi.pdf [file c2cp40085e-esi.pdf]

# Electrochemical hydrogen production in aqueous micellar solution by a diiron benzenedithiolate complex relevant to [FeFe] hydrogenases

François Quentel, Guillaume Passard and Frederic Gloaguen\*

## Electronic Supplementary Information

**Fig. S1.** Plots of absorbance at  $\lambda_{\text{max}}$  versus concentration of  $\text{Fe}_2(\text{bdt})(\text{CO})_6$  (**1**) in aqueous solution.

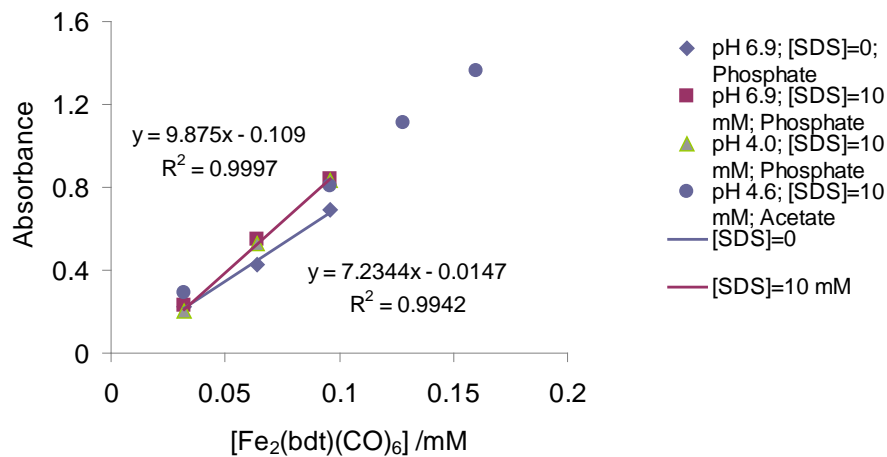

**Table S1.** Influence of SDS concentration, pH, and the buffer constituents on the absorbance of aqueous solution of **1**.

| Buffer    | pH  | [SDS] /mM | $\lambda_{\text{max}} / \text{nm}$ | $\epsilon / \text{M}^{-1} \text{cm}^{-1}$ |
|-----------|-----|-----------|------------------------------------|-------------------------------------------|
| Phosphate | 6.9 | 0.0       | 346.5                              | 7234                                      |
| Phosphate | 6.9 | 1.7       | 337.5                              |                                           |
| Phosphate | 6.9 | 10        | 335.0                              | 9531                                      |
| Phosphate | 6.9 | 50        | 335.5                              | 7289                                      |
| Phosphate | 4.0 | 10        | 335.0                              | 9875                                      |
| Acetate   | 4.7 | 10        | 335.0                              | 10047                                     |

**Fig. S2.** Differential pulse voltammetry (1<sup>st</sup> scan) of **1** at a freshly polished glassy carbon electrode in 0.1 M phosphate solution. pH was decreased by addition of strong acid. The peak current is poorly responsive to [**1**] indicating strong adsorption of the catalyst on the electrode surface, especially in the presence of SDS (see also Table S2 below). Measurements were carried out at with a scan rate of 2.5 mV s<sup>-1</sup> and amplitude of 50 mV. The electrode was 0.071 cm<sup>2</sup> in surface area.

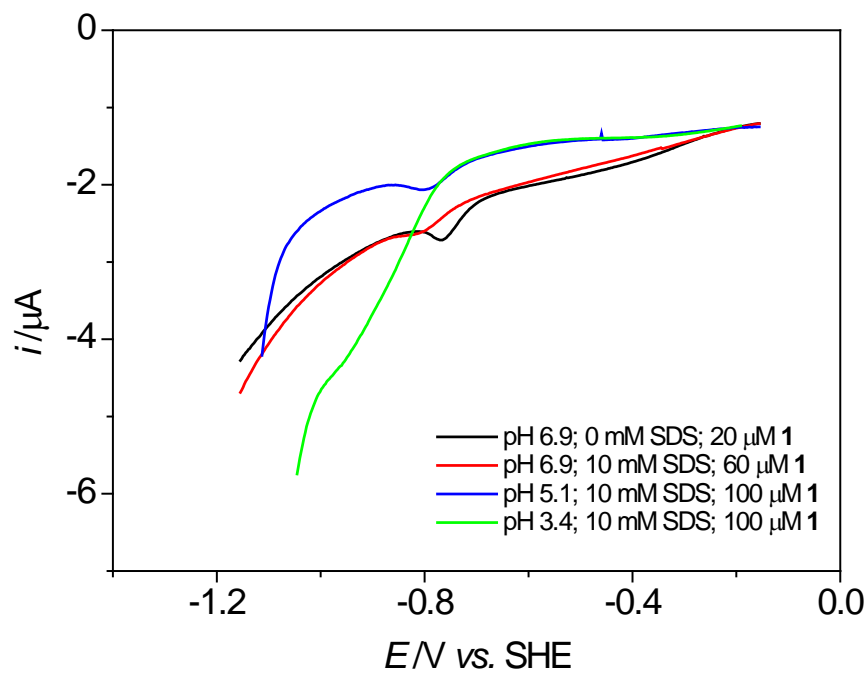

**Table S2.** Effect of the concentration of **1** and SDS in 0.1 M phosphate buffer on the peak current and potential recorded at a glassy carbon electrode (see Figure S2).

| [ <b>1</b> ] /μM | [SDS] /mM | - <i>i</i> <sub>p</sub> /μA | - <i>E</i> <sub>p</sub> /V vs. SHE | pH  |
|------------------|-----------|-----------------------------|------------------------------------|-----|
| 20               | 0         | 0.19                        | 0.69                               | 6.9 |
| 20               | 1.25      | 0.23                        | 0.77                               | 6.9 |
| 40               | 1.25      | 0.31                        | 0.77                               | 6.9 |
| 60               | 1.25      | 0.31                        | 0.77                               | 6.9 |
| 60               | 10        | 0.12                        | 0.80                               | 6.9 |
| 100              | 10        | 0.23                        | 0.80                               | 6.9 |
| 100              | 10        | 0.22                        | 0.79                               | 6.0 |
| 100              | 10        | 0.21                        | 0.79                               | 5.1 |

**Fig. S3.** Differential pulse polarography of  $\text{Fe}(\text{SO}_4)_4$  in 0.1 M phosphate buffer solution containing 10 mM SDS. Measurements were carried out at a dropping mercury electrode  $0.0052 \text{ cm}^2$  in surface area with a scan rate of  $2.5 \text{ mV s}^{-1}$  and amplitude of 50 mV. pH was decreased by addition of strong acid. Stars indicate voltammetric peaks due to the presence of SDS.

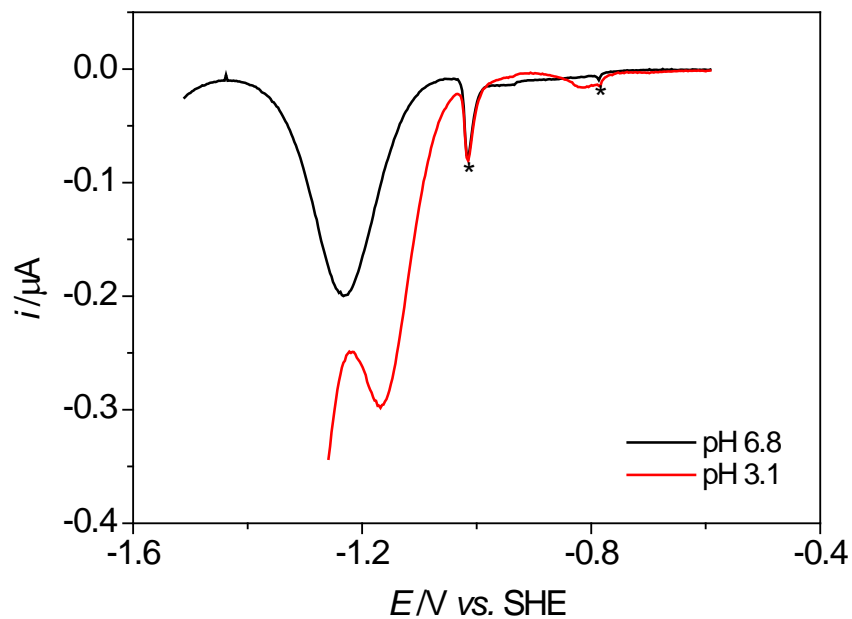

**Fig. S4.** Plot of the current enhancement versus the scan rate measured for 20  $\mu\text{M}$  **1** in 0.1 M NaCl containing 10 mM SDS and 10 mM acetic acid. Experiments were carried out at a hanging mercury electrode of 0.0052  $\text{cm}^2$  in surface area.

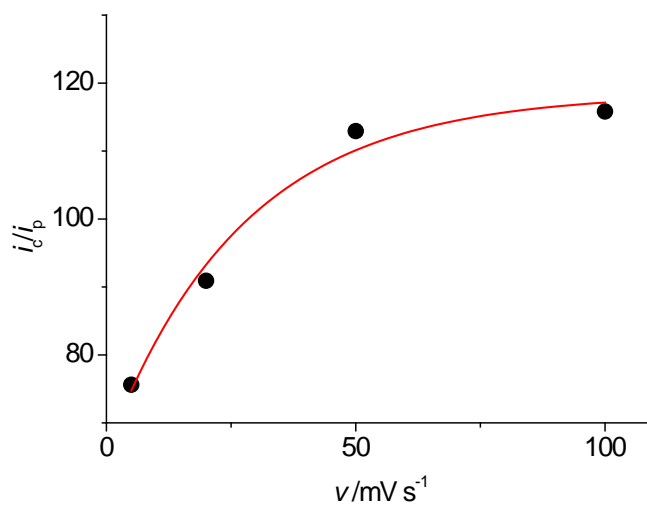

**Fig. S5.** Charge built-up versus time for electrolysis at  $-0.66$  V vs. SHE of  $8\text{ }\mu\text{M}$  **1** in  $0.1$  M NaCl containing  $10$  mM SDS and  $50$  mM acetic acid (pH  $3.0$ ). The blue and green traces correspond to the charge built-up in absence of **1** at a fresh and used Hg pool electrode, respectively. Detection of a low activity at the used electrode indicates slight adsorption of **1** during electrolysis.

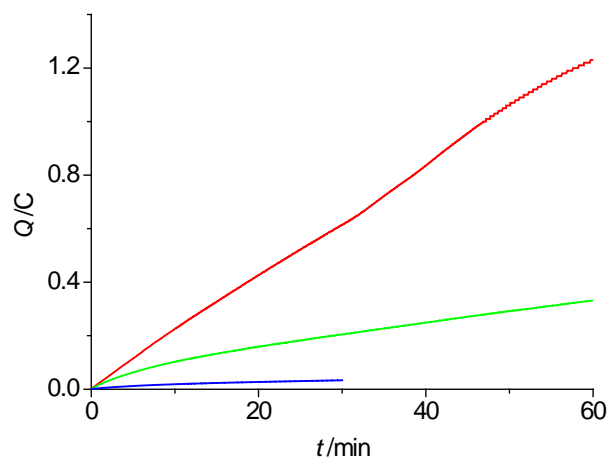

**Fig. S6.** Charge built-up versus time for electrolysis at  $-0.66$  V vs. SHE of  $80\text{ }\mu\text{M}$  **1** in  $0.1$  M NaCl containing  $10$  mM SDS and  $1$  mM HCl. The blue trace corresponds to the charge built-up in absence of **1**. The total charge passed during electrolysis of  $10$  mL of solution after correction of the blank is  $Q_{\text{tot}} = 0.513$  C. This corresponds to the consumption of  $Q_{\text{tot}}/F \times 100 = 5.32 \times 10^{-4}$  M of  $\text{H}^+$ . In the meantime, pH has increased from  $3.23$  to  $4.30$  corresponding to a decrease of  $10^{-3.23} - 10^{-4.30} = 5.39 \times 10^{-4}$  M of  $\text{H}^+$ . Comparison of these results allows us to conclude that catalyst **1** works at close to  $100\%$  Faradaic efficiency.

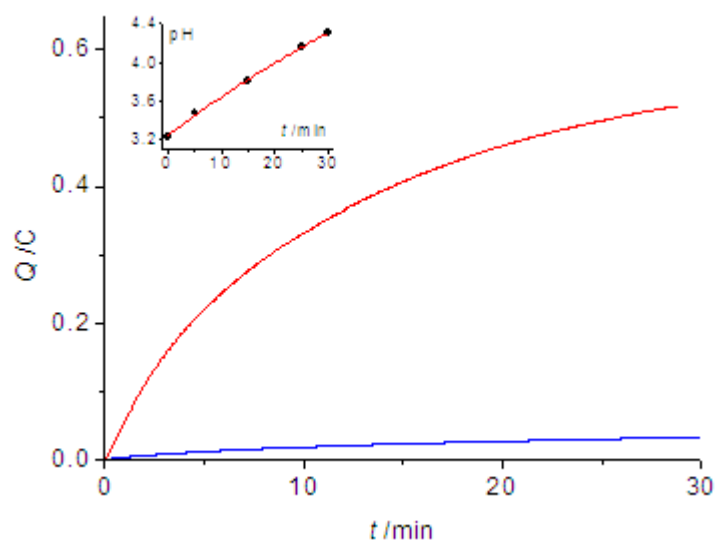

**Table S3.** Catalytic activity of **1** for H<sub>2</sub> production in aqueous SDS and acetonitrile solutions using acetic acid (HOAc) or toluenesulfonic acid (HOTs) as proton source: activation overpotential ( $\eta$ ), current enhancement ( $i_c/i_p$ ), and mole of H<sub>2</sub> per mole of catalyst (TON).

| Acid (pK <sub>a</sub> ) / Solvent | - $\eta/V$        | $i_c/i_p$ | TON (duration)              | Ref       |
|-----------------------------------|-------------------|-----------|-----------------------------|-----------|
| HOAc (4.8)/ H <sub>2</sub> O      | 0.45 <sup>a</sup> | 80        | 52 (1 hour)                 | this work |
| HOTs (8.7) / CH <sub>3</sub> CN   | 0.60 <sup>b</sup> | < 3       | 2.8 (2 hours)               | S1        |
| HOAc (22.3) / CH <sub>3</sub> CN  | 0.64 <sup>b</sup> | 14        | 5.5 (1/2 hour) <sup>c</sup> | S2        |

<sup>(a)</sup>  $\eta = E_{1/2} + 0.059 \times \text{pH}$ . <sup>(b)</sup> Calculated according the method described in Ref S3. <sup>(c)</sup> Most of the catalyst was decomposed after a period of half an hour.

## References

- S1. J. F. Capon, F. Gloaguen, P. Schollhammer and J. Talarmin, *J. Electroanal. Chem.*, 2006, **595**, 47.
- S2. G. A. N. Felton, A. K. Vannucci, J. Chen, L. T. Lockett, N. Okumura, B. J. Petro, U. I. Zakai, D. H. Evans, R. S. Glass and D. L. Lichtenberger, *J. Am. Chem. Soc.*, 2007, **129**, 12521.
- S3. G. A. N. Felton, R. S. Glass, D. L. Lichtenberger and D. H. Evans, *Inorg. Chem.*, 2006, **45**, 9181.
